# Supplementary material
Source: Research Square preprint supplement (doi:10.21203/rs.3.rs-9901835/v1)
Supplement: Supplementary file 1 [file 72f26e17c5ae4206f12c1b35.pdf]

| Primer ID    | Primer Sequence (5'-3')                         | Mutant ID                 | Associated Accession | NASC ID      | Insertion Primer |
|--------------|-------------------------------------------------|---------------------------|----------------------|--------------|------------------|
| dcr-LP       | ATCCACGTGGCATTATGAG                             | <i>dcr-2</i>              | AT5G23940            | SALK_128228  | LBb1.3           |
| dcr-RP       | ACAATTCCAAACCAACACAC                            |                           |                      |              |                  |
| cyp77a4-LP   | TCTCACTCCTGGTGGATGAG                            | <i>cyp77a4-4</i>          | AT5G04660            | SALK_046395C | LBb1.3           |
| cyp77a4-RP   | AACGTATGGCCCGATTTTAC                            |                           |                      |              |                  |
| cyp77a4-3-LP | GAATATCGTAACCAGCAAGCG                           | <i>cyp77a4-3</i>          | AT5G04660            | SALK_112368C | LBb1.3           |
| cyp77a4-3-RP | AACGTATGGCCCGATTTTAC                            |                           |                      |              |                  |
| lacs1-LP     | AAACCGAGATCTTAGCCAC                             | <i>lacs1-1</i>            | AT2G47240            | SALK_127191  | LBb1.3           |
| lacs1-RP     | ATCCATGAGGGATTCAAAAG                            |                           |                      |              |                  |
| bdg-LP       | AAATGAGCTCAAGCTCACGAG                           | <i>bdg1-8</i>             | AT1G64670            | N111629      | dSpm1            |
| bdg-RP       | TCAGCCAAATCGAATTACAGG                           |                           |                      |              |                  |
| abcg11-LP    | TAACATCTGTCCGGAAGACG                            | <i>abcg11-7</i>           | AT1G17840            | GABI_590C03  | GK_LB_o8474      |
| abcg11-RP    | TCAATTCTTCTCCCAACCATC                           |                           |                      |              |                  |
| gpat8LP      | AAACTCCTATTGAACCCCTG                            | <i>gpat8</i>              | AT4G00400            | SALK_035914  | LBb1.3           |
| gpat8RP      | TAACGAATCACCTGATCTCGG                           |                           |                      |              |                  |
| prx71-1LP    | TCATCTATCCCCACAAACAC                            | <i>prx71-1</i>            | AT5G64120            | SALK_123643  | LBb1.3           |
| prx71-1RP    | TGTCCGGTGGTATTGAATAGC                           |                           |                      |              |                  |
| rbodFw       | GTCGCCAAAGGAGGCGCCGA                            | <i>rbodD</i>              | AT5G47910            | N9555        | dSpm1            |
| rbodRev      | GGATACTGATCATAGGCGTGGCTCCA                      |                           |                      |              |                  |
| LBb1.3       | ATTTTGCCGATTTTCGGAAC                            |                           |                      |              |                  |
| dSpm1        | CTTATTTAGTAAGAGTGTGGGTTTTGG                     |                           |                      |              |                  |
| GK_LB_o8474  | ATAATAACGCTGCGGACATCTACATTT                     |                           |                      |              |                  |
| proDCR-F     | AACAGGTCTCAACCTGTTGTCTTGCGATATGCTT<br>GTG       | Greengate Cloning Primers |                      |              |                  |
| proDCR-R     | AACAGGTCTCTTGTGGTGAAAGAGATTTAAC<br>TGGC         |                           |                      |              |                  |
| proSAUR16-F  | AACAGGTCTCAACCTTTTCCACTTCAGATCTTGC<br>CA        |                           |                      |              |                  |
| proSAUR16-R  | AACAGGTCTCTGTTTTGTTTAGTTCTAGTGT<br>TGTTT        |                           |                      |              |                  |
| proSAUR57-F  | AACAGGTCTCAACCTCTTCTAAACACTTTGTG<br>GTATA       |                           |                      |              |                  |
| proSAUR57-R  | AACAGGTCTCTGTTTTGAGTATAGAATGAGA<br>GGTTT        |                           |                      |              |                  |
| CDEF1-F      | AACAGGTCTCAGGCTCAACAATGGTCGAGGGAG<br>AGTCCA     |                           |                      |              |                  |
| CDEF1-R      | AACAGGTCTCTGAATTCCTAACTGGGATAT<br>GTT           |                           |                      |              |                  |
| DCRFwGG      | AACAGGTCTCAGGCTCAACAATGAAGATAAAG<br>ATTATGAGCAA |                           |                      |              |                  |
| DCRRevGG     | AACAGGTCTCTGAAACAAACCCATTGCCATT<br>TCC          |                           |                      |              |                  |
