# Supplementary material
Source: Research Square preprint supplement (doi:10.21203/rs.3.rs-9901835/v1)
Supplement: Supplementary file 3 [file 91586196b0a791e4fa0de911.pdf]

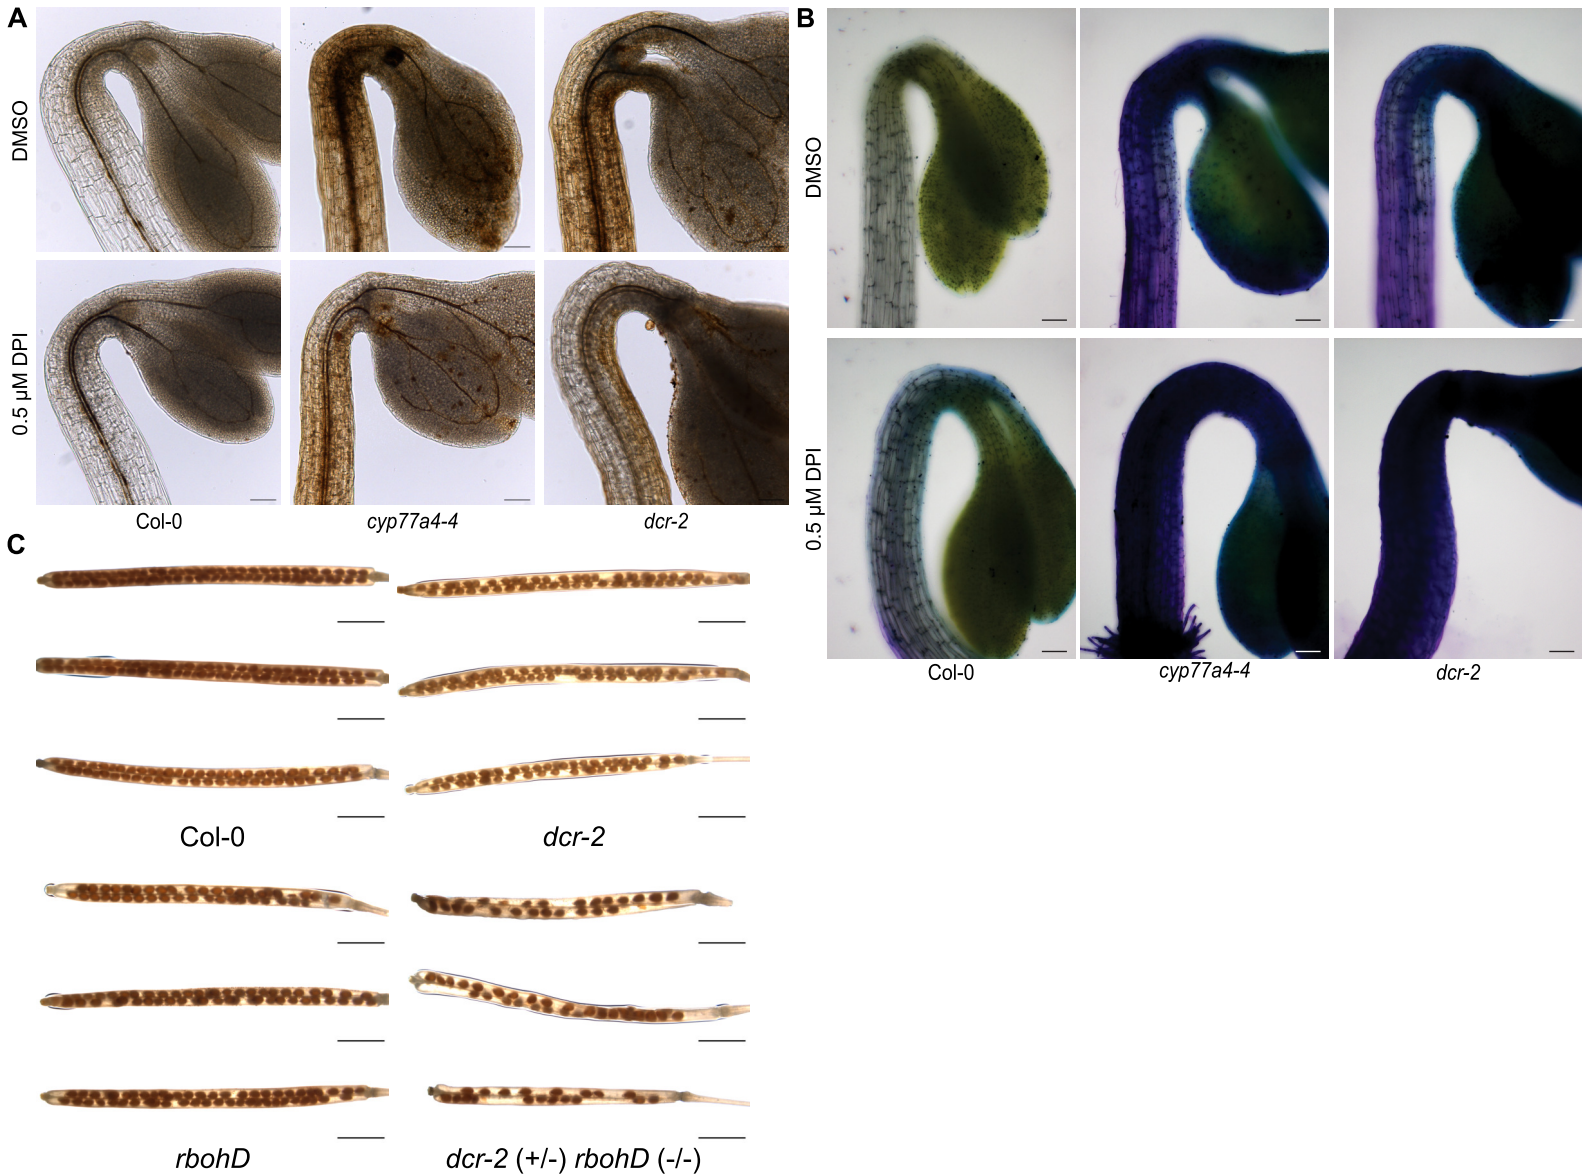

**Figure S3. ROS link cuticle integrity to apical hook curvature stability** (A-B) Representative light micrographs of dark-grown upper hypocotyls and apical hooks of Col-0, *cyp77a4-4* and *dcr-2* grown on medium supplemented with 0.5  $\mu$ M DPI in the maintenance phase (48 hours post-germination) after DAB staining (A) or toluidine blue staining (B). Scale bars represent 100  $\mu$ m. 5 to 8 seedlings were analyzed for DAB and TB staining over 3 biological replicates. (C) Pictures of siliques of Col-0, *dcr-2*, *rbohD* and the siliques of *dcr-2(+/-)rbohD(-/-)*. The potential embryo lethal phenotype was detected in siliques by the presence of empty spots (seed potentially arrested in early embryo development). 10 siliques were examined per genotype in two replicates.
