# Supplementary material
Source: Research Square preprint supplement (doi:10.21203/rs.3.rs-9901835/v1)
Supplement: Supplementary file 5 [file ba14d00aeb23ad7655856d20.pdf]

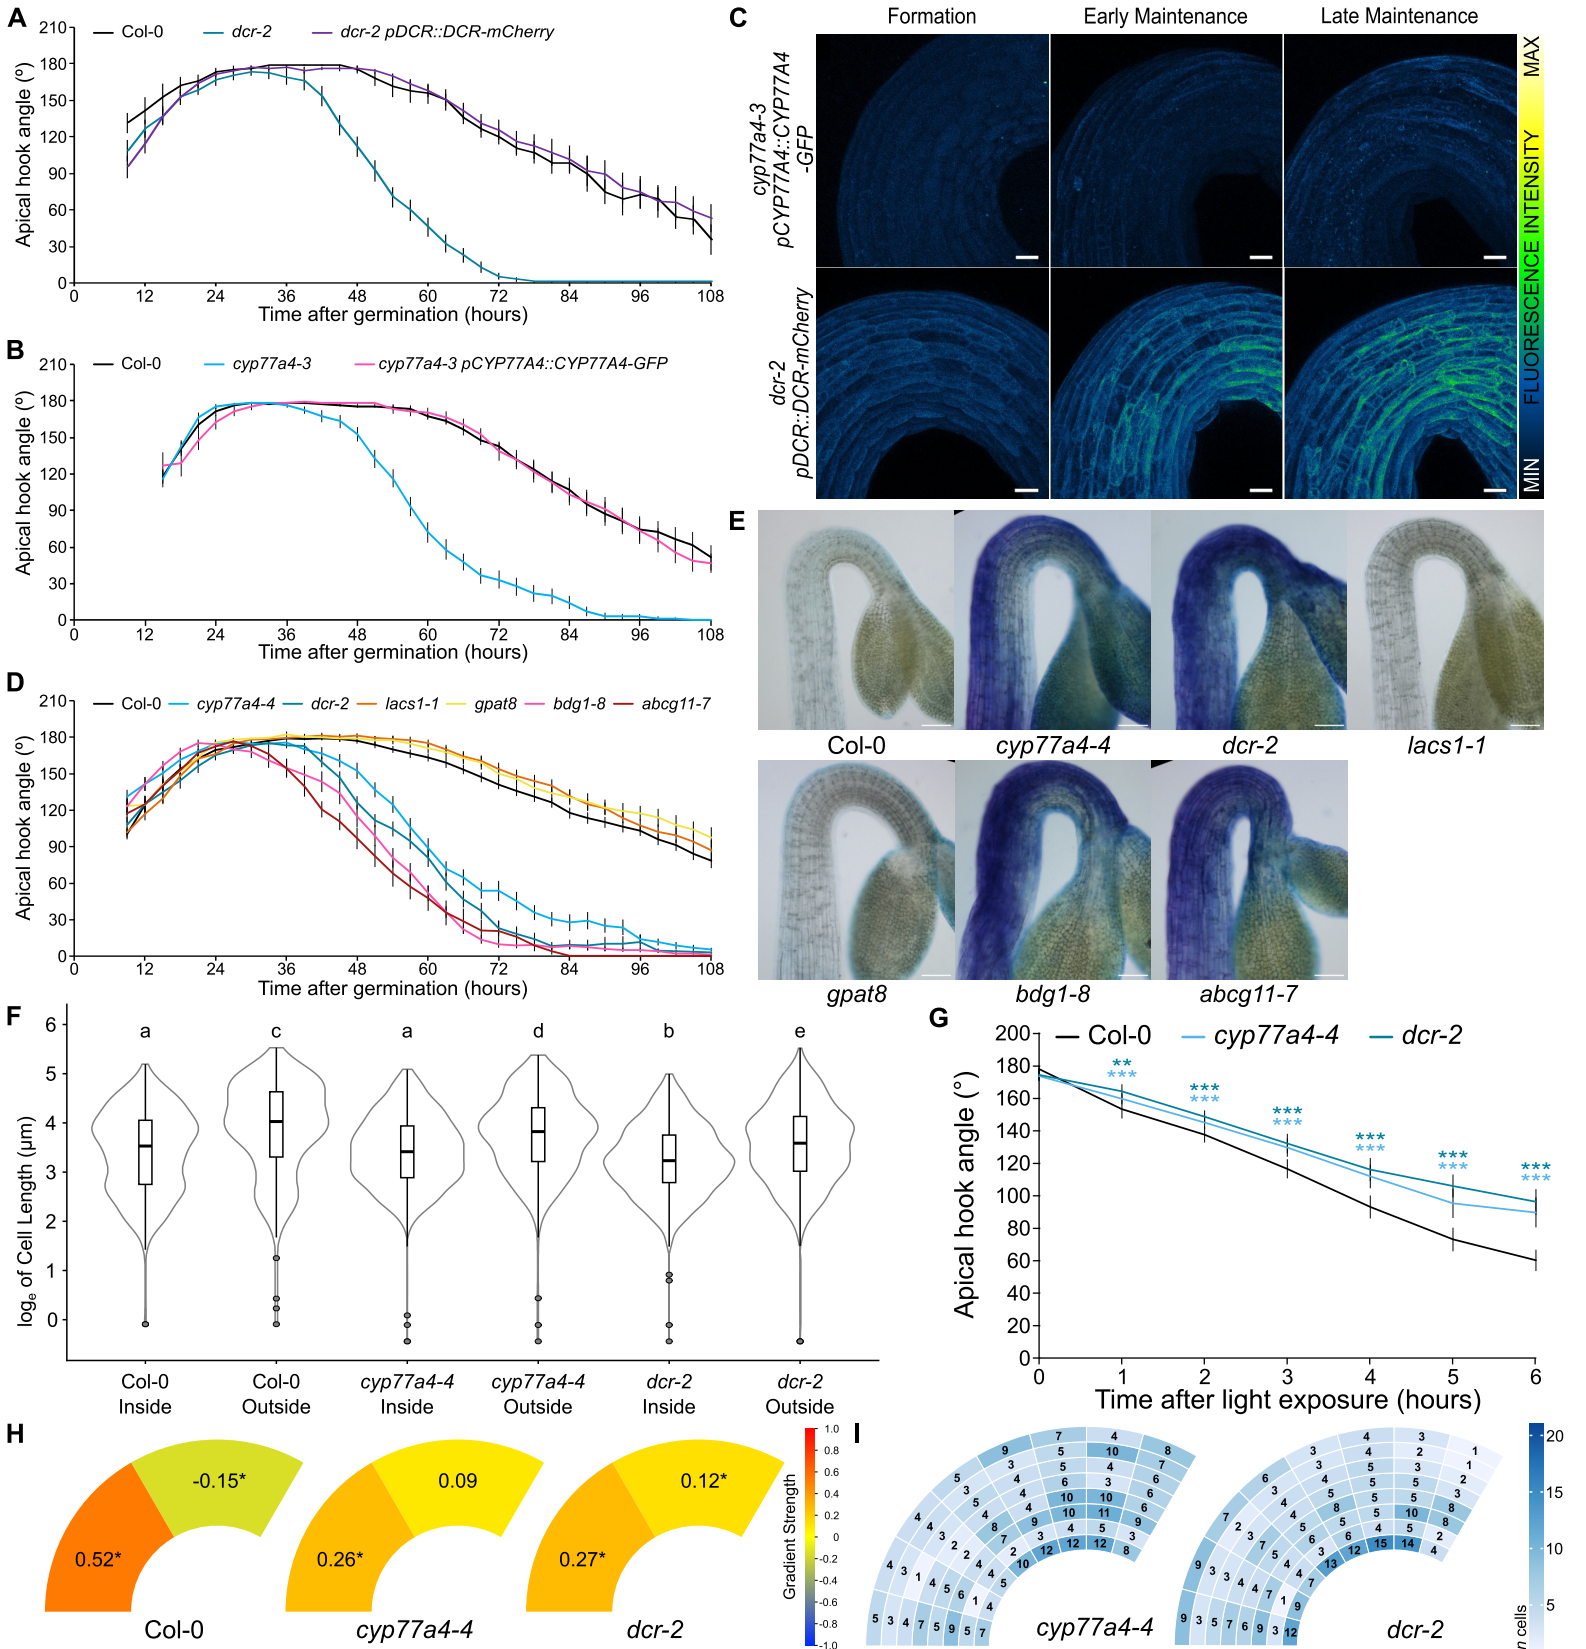

**Figure S2. Cuticle integrity is essential for apical hook development.** (A–B) Kinematics of mean apical hook angle in dark-grown Col-0 ( $n = 7$  (A); 15 (B)), *dcr-2* ( $n = 14$ ) and *dcr-2 pDCR::DCR-mCherry* ( $n = 15$ ) (A) or *cyp77a4-3* ( $n = 15$ ) and *cyp77a4-3 pCYP77A4::CYP77A4-GFP* ( $n = 17$ ) (B). Error bars represent standard error of the mean. (C) Representative live confocal micrographs of dark-grown apical hooks of *cyp77a4-3 pCYP77A4::CYP77A4-GFP* and *dcr-2 pDCR::DCR-mCherry* in the formation (4–6 seedlings, 1 replicate), early maintenance (9–14 seedlings, 2 replicates) and late maintenance phases (14–15 seedlings, 3 replicates) (approximately 24, 36 and 48 hours after germination, respectively). Scale bars represent 20  $\mu\text{m}$ . Increasing fluorescence intensity is color-coded according to the scale shown. (D) Kinematics of mean apical hook angle in dark-grown Col-0 ( $n = 70$ ), *cyp77a4-4* ( $n = 25$ ), *dcr-2* ( $n = 25$ ), *lacs1-1* ( $n = 25$ ), *gpat8* ( $n = 25$ ), *bdg1-8* ( $n = 25$ ) and *abcg11-7* ( $n = 11$ ). Error bars represent standard error of the mean. (E) Representative light micrographs of dark-grown upper hypocotyls and apical hooks of the lines shown in (D) in the maintenance phase (48 hours post-germination) after toluidine blue staining. 3–14 seedlings were stained across 2 replicates. Scale bars represent 50  $\mu\text{m}$ . (F) Box and violin plots of the natural logarithm of cell length for each domain shown, in apical hooks stained with PI in Col-0, *cyp77a4-4* and *dcr-2* backgrounds at approximately 48 hours after germination. 900–1600 cells per genotype were measured over at least three biological replicates. Different letters indicate statistically significant differences based on a non-parametric Kruskal-Wallis followed by Dunn's *post hoc* tests ( $\alpha = 0.05$ ).  $n = 563, 364, 775, 518, 931, 745$  for Col-0 Inside, Outside; *cyp77a4-4* Inside, Outside; *dcr-2* Inside, Outside. Box plots show the median (centre line), the IQR (inter-quartile range) (box: 25th to 75th percentiles) and whiskers extending to the most extreme values within  $1.5 \times \text{IQR}$ . (G) Kinematics of apical hook angle in dark-grown Col-0, *cyp77a4-4* and *dcr-2* upon treatment with light, as measured every 1 hour, with 0 hour as the time point of light exposure. Seedlings were light-treated at 24 hours post-germination. The means of 20 seedlings per line are shown; error bars represent standard error of the mean. Asterisks indicate significant difference of *cyp77a4-4* (light blue) or *dcr-2* (dark blue) to Col-0 according to the Student's *t*-test (\*\* $P < 0.01$ , \*\*\* $P < 0.001$ ). (H) Schematics representing apical and basal elongation gradient strength in Col-0, *cyp77a4-4* and *dcr-2*, expressed as the difference between estimated mean strains in the inner and outer domains. A positive value indicates that the inner domain has a higher strain than the outer domain and *vice-versa*. Asterisks represent significant differences in average longitudinal strain in comparisons between inner and outer domains. A linear model with interaction effects between genotypes and domains was used for a pairwise comparison followed by a Dunn-Sidak correction ( $\alpha = 0.05$ ). (I) Exact  $n$  for positional bins represented in Figure 2G
